# Supplementary material for: Spontaneous chiral resolution of a 3D (3,12)-connected MOF with an unprecedented ttt topology consisting of cubic [Cd4(μ3-OH)4] clusters and propeller-like ligands
Source: Royal Society of Chemistry journal article supplement (doi:10.1039/c4ce00028e), 2014-01-01
Supplement: c4ce00028e1.pdf [file c4ce00028e1.pdf]

## Electronic Supplementary Information (ESI) for *CrystEngComm*

### Spontaneous chiral resolution of a 3D (3,12)-connected MOF with unprecedented ttt topology consisting of cubic $[\text{Cd}_4(\mu_3\text{-OH})_4]$ cluster and propellerlike ligand

Shuai Yuan,<sup>a,†</sup> Yong-Kai Deng,<sup>a,†</sup> Wei-Min Xuan,<sup>b,†</sup> Xing-Po Wang,<sup>a</sup> Su-Na Wang,<sup>c</sup> Jian-Min Dou,<sup>c</sup> Di Sun<sup>a\*</sup>

<sup>a</sup>Key Lab of Colloid and Interface Chemistry, Ministry of Education, School of Chemistry and Chemical Engineering, Shandong University, Jinan, 250100, P. R. China.

E-mail: dsun@sdu.edu.cn. Fax: +86-531-88364218.

<sup>b</sup>School of Chemistry, WestCHEM, University of Glasgow, Glasgow, G12 8QQ, U.K.

<sup>c</sup>Shandong Provincial Key Laboratory of Chemical Energy Storage and Novel Cell Technology, School of Chemistry and Chemical Engineering, Liaocheng University, Liaocheng, P. R. China.

|                                                                                                                         |    |
|-------------------------------------------------------------------------------------------------------------------------|----|
| 1. General Information.....                                                                                             | 2  |
| 2. Synthesis of $[\text{Cd}(\text{tipa})(\mu_3\text{-OH})\cdot\text{NO}_3\cdot\text{EtOH}\cdot\text{DMF}]_n$ (1). ..... | 3  |
| 3. Transformation of 1 to $[\text{Cd}(\text{tipa})(\mu_3\text{-OH})\cdot\text{I}_3\cdot\text{DMF}]_n$ (2).....          | 3  |
| 4. Crystal structure determination of 1 and 2. ....                                                                     | 4  |
| 5. Table S1. Crystal Data Collection and Structure Refinement for 1A and 1A.....                                        | 5  |
| 6. Table S2. Selected bond lengths (Å) in 1A and 1A. ....                                                               | 6  |
| 7. Figure S1. XRD patterns. ....                                                                                        | 7  |
| 8. Figure S2. The TGA for 1.....                                                                                        | 8  |
| 9 Table S3. The comparison between reported (3,12)-connected networks and 1.....                                        | 9  |
| 10. Figure S3. The CD spectrum of all crystals of a single batch for 1. ....                                            | 11 |
| 11. Figure S4. The FT-IR spectra of anion-exchange for 1.....                                                           | 12 |
| 12. Table S4. Crystal Data Collection and Structure Refinement for 2.....                                               | 13 |
| 13. Figure S5. The porous structure of 1A.....                                                                          | 14 |
| 14. Figure S6. The TGA and Elemental Analysis for 2. ....                                                               | 15 |
| 15. TOPOS result. ....                                                                                                  | 16 |

## 1. General Information.

All chemicals and solvents used in the syntheses were of analytical grade and used without further purification. IR spectra were recorded on a Nicolet AVATAT FT-IR360 spectrometer as KBr pellets in the frequency range of 4000-400  $\text{cm}^{-1}$ . The elemental analyses (C, H, N contents) were determined on a Vario EL III analyzer. Powder X-ray diffraction (PXRD) data were collected on a Philips X'Pert Pro MPD X-ray diffractometer with Cu  $K_{\alpha}$  radiation equipped with an X'Celerator detector. Thermogravimetric analyses (TGA) were performed on a Netzsch STA 449C thermal analyzer from room temperature to 800 ° C under nitrogen atmosphere at a heating rate of 10° C/min.

## 2. Synthesis of $[\text{Cd}(\text{tipa})(\mu_3\text{-OH})\cdot\text{NO}_3\cdot\text{EtOH}\cdot\text{DMF}]_n$ (**1**).

A mixture of  $\text{Cd}(\text{NO}_3)_2\cdot 4\text{H}_2\text{O}$  (61.7 mg, 0.2 mmol) and tipa (6.65 mg, 0.015 mmol) were stirred in DMF-EtOH mixed solvent (4 mL, v/v: 1/1). Then aqueous  $\text{NH}_3$  solution (25 %) was dropped into the mixture to give a clear solution under ultrasonic treatment. The resultant solution was allowed to evaporate slowly at room temperature for two weeks to give colorless crystals of **1** (yield, 51 %). They were washed with small volumes of cold EtOH and diethyl ether. Anal. for  $\text{CdC}_{32}\text{H}_{35}\text{N}_9\text{O}_5$ : calcd. C 52.07, H 4.78, N 17.08; found C 52.37, H 4.99, N 16.69. IR (KBr):  $\nu$  ( $\text{cm}^{-1}$ ) = 1661(s), 1521(s), 1384(s), 1305(s), 1117(s), 1062(m), 960 (w), 931 (w), 833 (s), 745 (m), 654 (w).

## 3. Transformation of **1** to $[\text{Cd}(\text{tipa})(\mu_3\text{-OH})\cdot\text{I}_3\cdot\text{DMF}]_n$ (**2**).

When crystals of **1** were immersed in a solution of DMF-EtOH (v:v = 1:1) solution of iodine ( $0.2 \text{ mol L}^{-1} \text{ KI} + 0.1 \text{ mol L}^{-1} \text{ I}_2$ ) for two weeks, the colour of the crystals changed from colorless to red with no discernible degradation of its macroscopic integrity. They were washed ten times with 20 mL cold EtOH for each time.

#### 4. Crystal structure determination of **1** and **2**.

Single crystals of the complexes **1** and **2** with appropriate dimensions were chosen under an optical microscope and quickly coated with high vacuum grease (Dow Corning Corporation) before being mounted on a glass fiber for data collection. Data for them were collected on a Bruker Apex II CCD diffractometer with graphite-monochromated Mo K $\alpha$  radiation source ( $\lambda = 0.71073 \text{ \AA}$ ) at 173K. A preliminary orientation matrix and unit cell parameters were determined from 3 runs of 12 frames each, each frame corresponds to a  $0.5^\circ$  scan in 5 s, followed by spot integration and least-squares refinement. For **1-2**, data were measured using  $\omega$  scans of  $0.5^\circ$  per frame for 40 s until a complete hemisphere had been collected. Cell parameters were retrieved using SMART software and refined with SAINT on all observed reflections. Data reduction was performed with the SAINT software and corrected for Lorentz and polarization effects. Absorption corrections were applied with the program SADABS. In all cases, the highest possible space group was chosen. All structures were solved by direct methods using SHELXS-97 and refined on  $F^2$  by full-matrix least-squares procedures with SHELXL-97. Atoms were located from iterative examination of difference  $F$ -maps following least squares refinements of the earlier models. Hydrogen atoms were placed in calculated positions and included as riding atoms with isotropic displacement parameters 1.2-1.5 times  $U_{\text{eq}}$  of the attached C atoms. All structures were examined using the Addsym subroutine of PLATON to assure that no additional symmetry could be applied to the models. Pertinent crystallographic data collection and refinement parameters are collated in Table S1. Selected bond lengths and angles are collated in Table S2.

**5. Table S1. Crystal Data Collection and Structure Refinement for 1A and 1A.**

| Complex                                     | <b>1A</b>                                                       | <b>1A</b>                                                       |
|---------------------------------------------|-----------------------------------------------------------------|-----------------------------------------------------------------|
| Empirical formula                           | <b>C<sub>32</sub>H<sub>35</sub>CdN<sub>9</sub>O<sub>6</sub></b> | <b>C<sub>32</sub>H<sub>35</sub>CdN<sub>9</sub>O<sub>6</sub></b> |
| Formula weight                              | <b>754.09</b>                                                   | <b>754.09</b>                                                   |
| Temperature/K                               | 173(2)                                                          | 173(2)                                                          |
| Crystal system                              | cubic                                                           | cubic                                                           |
| Space group                                 | F23                                                             | F23                                                             |
| a/Å                                         | 25.3961(9)                                                      | 25.704(3)                                                       |
| b/Å                                         | 25.3961(9)                                                      | 25.704(3)                                                       |
| c/Å                                         | 25.3961(9)                                                      | 25.704(3)                                                       |
| α/°                                         | 90.00                                                           | 90.00                                                           |
| β/°                                         | 90.00                                                           | 90.00                                                           |
| γ/°                                         | 90.00                                                           | 90.00                                                           |
| Volume/Å <sup>3</sup>                       | 16379.5(10)                                                     | 16983(3)                                                        |
| Z                                           | 16                                                              | 16                                                              |
| ρ <sub>calc</sub> /mg/mm <sup>3</sup>       | <b>1.223</b>                                                    | <b>1.180</b>                                                    |
| μ/mm <sup>-1</sup>                          | <b>0.580</b>                                                    | <b>0.560</b>                                                    |
| F(000)                                      | <b>6176.0</b>                                                   | <b>6176.0</b>                                                   |
| 2θ range for data collection                | 5.32 to 50°                                                     | 5.26 to 49.94°                                                  |
| Reflections collected                       | 18992                                                           | 10189                                                           |
| Independent reflections                     | 2412[R(int) = 0.0810]                                           | 2402[R(int) = 0.0826]                                           |
| Data/restraints/parameters                  | 2412/72/97                                                      | 2402/0/109                                                      |
| Final R indexes [I>=2σ (I)]                 | R <sub>1</sub> = 0.0689, wR <sub>2</sub> = 0.1884               | R <sub>1</sub> = 0.0529, wR <sub>2</sub> = 0.1259               |
| Final R indexes [all data]                  | R <sub>1</sub> = 0.0955, wR <sub>2</sub> = 0.2091               | R <sub>1</sub> = 0.0811, wR <sub>2</sub> = 0.1337               |
| Largest diff. peak/hole / e Å <sup>-3</sup> | 0.66/-0.29                                                      | 0.51/-0.32                                                      |
| Flack parameter                             | -0.08(13)                                                       | 0.04(8)                                                         |

**6. Table S2. Selected bond lengths (Å) in 1A and 1A.**

| <b>1A</b>                                                                                                                   |           |                                         |           |
|-----------------------------------------------------------------------------------------------------------------------------|-----------|-----------------------------------------|-----------|
| Cd1—N1 <sup>i</sup>                                                                                                         | 2.271 (9) | Cd1—O1                                  | 2.450 (7) |
| Cd1—N1 <sup>ii</sup>                                                                                                        | 2.271 (9) | Cd1—O1 <sup>iii</sup>                   | 2.450 (7) |
| Cd1—N1                                                                                                                      | 2.271 (9) | Cd1—O1 <sup>iv</sup>                    | 2.450 (7) |
| N1 <sup>i</sup> —Cd1—N1 <sup>ii</sup>                                                                                       | 87.4 (3)  | N1—Cd1—O1 <sup>iii</sup>                | 93.3 (3)  |
| N1 <sup>i</sup> —Cd1—N1                                                                                                     | 87.4 (3)  | O1—Cd1—O1 <sup>iii</sup>                | 85.8 (4)  |
| N1 <sup>ii</sup> —Cd1—N1                                                                                                    | 87.4 (3)  | N1 <sup>i</sup> —Cd1—O1 <sup>iv</sup>   | 93.3 (3)  |
| N1 <sup>i</sup> —Cd1—O1                                                                                                     | 178.9 (3) | N1 <sup>ii</sup> —Cd1—O1 <sup>iv</sup>  | 93.5 (3)  |
| N1 <sup>ii</sup> —Cd1—O1                                                                                                    | 93.3 (3)  | N1—Cd1—O1 <sup>iv</sup>                 | 178.9 (3) |
| N1—Cd1—O1                                                                                                                   | 93.5 (3)  | O1—Cd1—O1 <sup>iv</sup>                 | 85.8 (4)  |
| N1 <sup>i</sup> —Cd1—O1 <sup>iii</sup>                                                                                      | 93.5 (3)  | O1 <sup>iii</sup> —Cd1—O1 <sup>iv</sup> | 85.8 (4)  |
| N1 <sup>ii</sup> —Cd1—O1 <sup>iii</sup>                                                                                     | 178.9 (3) |                                         |           |
| Symmetry codes: (i) $-y+1/2, -z+1/2, x$ ; (ii) $z, -x+1/2, -y+1/2$ ; (iii) $-x+1/2, y, -z+1/2$ ; (iv) $-x+1/2, -y+1/2, z$ . |           |                                         |           |

| <b>1A</b>                                                                                                                                                                                |             |                                         |             |
|------------------------------------------------------------------------------------------------------------------------------------------------------------------------------------------|-------------|-----------------------------------------|-------------|
| Cd1—N1                                                                                                                                                                                   | 2.347 (6)   | Cd1—O1 <sup>iii</sup>                   | 2.529 (5)   |
| Cd1—N1 <sup>i</sup>                                                                                                                                                                      | 2.347 (6)   | Cd1—O1                                  | 2.529 (5)   |
| Cd1—N1 <sup>ii</sup>                                                                                                                                                                     | 2.347 (6)   | Cd1—O1 <sup>iv</sup>                    | 2.529 (5)   |
| N1—Cd1—N1 <sup>i</sup>                                                                                                                                                                   | 86.6 (2)    | N1 <sup>ii</sup> —Cd1—O1                | 93.1 (2)    |
| N1—Cd1—N1 <sup>ii</sup>                                                                                                                                                                  | 86.6 (2)    | O1 <sup>iii</sup> —Cd1—O1               | 86.8 (3)    |
| N1 <sup>i</sup> —Cd1—N1 <sup>ii</sup>                                                                                                                                                    | 86.6 (2)    | N1—Cd1—O1 <sup>iv</sup>                 | 179.68 (17) |
| N1—Cd1—O1 <sup>iii</sup>                                                                                                                                                                 | 93.1 (2)    | N1 <sup>i</sup> —Cd1—O1 <sup>iv</sup>   | 93.1 (2)    |
| N1 <sup>i</sup> —Cd1—O1 <sup>iii</sup>                                                                                                                                                   | 93.5 (2)    | N1 <sup>ii</sup> —Cd1—O1 <sup>iv</sup>  | 93.5 (2)    |
| N1 <sup>ii</sup> —Cd1—O1 <sup>iii</sup>                                                                                                                                                  | 179.68 (17) | O1 <sup>iii</sup> —Cd1—O1 <sup>iv</sup> | 86.8 (3)    |
| N1—Cd1—O1                                                                                                                                                                                | 93.5 (2)    | O1—Cd1—O1 <sup>iv</sup>                 | 86.8 (3)    |
| N1 <sup>i</sup> —Cd1—O1                                                                                                                                                                  | 179.68 (17) |                                         |             |
| Symmetry codes: (i) $-y+1, z+1/2, -x+1/2$ ; (ii) $-z+1/2, -x+1, y-1/2$ ; (iii) $-x+1/2, -y+3/2, z$ ; (iv) $x, -y+3/2, -z+1/2$ ; (v) $-z+1, x+1/2, -y+3/2$ ; (vi) $y-1/2, -z+3/2, -x+1$ . |             |                                         |             |

**7. Figure S1. XRD patterns.**

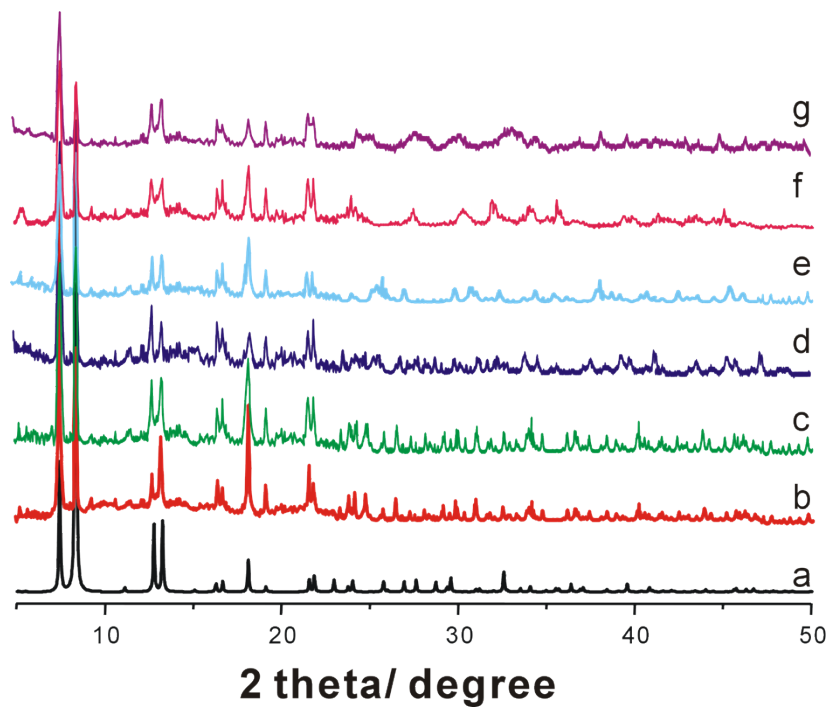

a) **1** simulated, b) **1** measured, c) the solid after the anion-exchange with d)  $\text{NaClO}_4$ , e)  $\text{NH}_4\text{PF}_6$ , and f)  $\text{NaBF}_4$ . g) iodine-included **1**.

**8. Figure S2. The TGA for 1.**

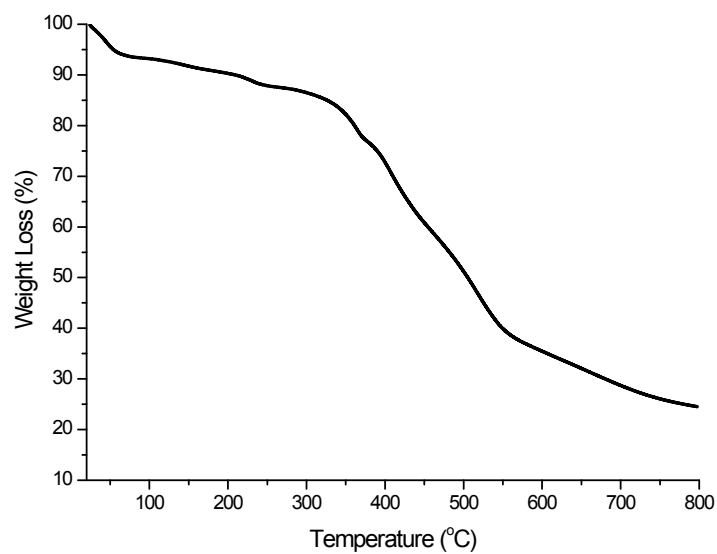

Thermogravimetry indicates complex **1** releases lattice solvent molecules start around the room temperature and the complete loss all solvents (DMF and EtOH) to 330 °C (Cal. 16.1%; Found. 15.3%), then the guest-free framework begins to decompose above 330 °C along with the release of  $\text{NO}_3^-$ ,  $\text{OH}^-$  and organic ligands. These results are well agreement with crystal structure of **1**.



**9 Table S3. The comparison between reported (3,12)-connected networks and 1.**

| Formulae                                                                                                                                                                                                                                          | topology    | Schläfli symbol                                                                                                                                           | reference                                                | Cluster-based SBU                                                                                                                                                                                         |
|---------------------------------------------------------------------------------------------------------------------------------------------------------------------------------------------------------------------------------------------------|-------------|-----------------------------------------------------------------------------------------------------------------------------------------------------------|----------------------------------------------------------|-----------------------------------------------------------------------------------------------------------------------------------------------------------------------------------------------------------|
| [Na <sub>0.5</sub> Zn <sub>4.75</sub> (μ <sub>3</sub> -OH) <sub>2</sub> (BTB) <sub>2</sub> (HBTB)(H <sub>2</sub> O) <sub>0.5</sub> ]·5DMF·1.5EtOH·10H <sub>2</sub> O<br>(H <sub>3</sub> BTB=Benzene-1,3,5-tribenzoic acid)                        | N<br>/<br>A | {4 <sup>12</sup> ·6 <sup>36</sup> ·8 <sup>18</sup> } <sub>2</sub><br>{4 <sup>12</sup> ·6 <sup>24</sup> ·8 <sup>30</sup> } {4 <sup>3</sup> } <sub>12</sub> | <i>Chem. Commun.</i> , <b>2008</b> , 34, 4019            | [NaZn <sub>6</sub> (μ <sub>3</sub> -OH) <sub>2</sub> (COO) <sub>12</sub> ] and [Zn <sub>7</sub> (μ <sub>3</sub> -OH) <sub>4</sub> (COO) <sub>8</sub> (COO) <sub>8</sub> (H <sub>2</sub> O) <sub>2</sub> ] |
| [Co <sub>5</sub> (μ <sub>3</sub> -OH) <sub>2</sub> (5-NH <sub>2</sub> -bdc) <sub>4</sub> (H <sub>2</sub> O) <sub>2</sub> ]·37.5H <sub>2</sub> O (5-NH <sub>2</sub> -bdc=5-aminoisophthalate)                                                      | N<br>/<br>A | {4 <sup>19</sup> ·6 <sup>27</sup> ·8 <sup>20</sup> } {4 <sup>3</sup> } <sub>4</sub>                                                                       | <i>Cryst. Growth &amp; Des.</i> , <b>2009</b> , 9, 4239  | [Co <sub>5</sub> (μ <sub>3</sub> -OH) <sub>2</sub> ]                                                                                                                                                      |
| [Ln <sub>4</sub> (OH) <sub>4</sub> (3-SBA) <sub>4</sub> (H <sub>2</sub> O) <sub>4</sub> ]·nH <sub>2</sub> O, [Ln=Eu, n=10; Gd, n=10; Tb, n=8; 3-SBA= 3-sulfobenzoate]                                                                             | N<br>/<br>A | {4 <sup>20</sup> ·6 <sup>28</sup> ·8 <sup>18</sup> } {4 <sub>3</sub> } <sub>4</sub>                                                                       | <i>Inorg. Chem.</i> <b>2010</b> , 49, 1865               | [Ln <sub>4</sub> (OH) <sub>4</sub> ]                                                                                                                                                                      |
| [Co <sub>8</sub> (μ <sub>3</sub> -OH) <sub>4</sub> (SO <sub>4</sub> ) <sub>2</sub> (dcpbpy) <sub>4</sub> (H <sub>2</sub> O) <sub>4</sub> ]·12DMF·4EtOH·24H <sub>2</sub> O (H <sub>2</sub> dcpbpy=2,6-di- <i>p</i> -carboxyphenyl-4,4'-bipyridine) | N<br>/<br>A | {4 <sup>12</sup> ·6 <sup>34</sup> ·8 <sup>20</sup> } {4 <sub>3</sub> } <sub>4</sub>                                                                       | <i>Chem. Commun.</i> , <b>2010</b> , 46, 6311            | [Co <sub>8</sub> (μ <sub>3</sub> -OH) <sub>4</sub> (SO <sub>4</sub> ) <sub>2</sub> ]                                                                                                                      |
| [Zn <sub>8</sub> (μ <sub>3</sub> -OH) <sub>4</sub> (oba) <sub>6</sub> (bbi)(H <sub>2</sub> O) <sub>2</sub> ], (H <sub>2</sub> oba= 4,4'-oxybis(benzoate), bbi=1,1'-(1,4-butanediyl)bis(imidazole))                                                | N<br>/<br>A | {3 <sup>2</sup> ·4 <sup>2</sup> } <sup>2</sup> {3 <sup>8</sup> ·4 <sup>2</sup> ·5 <sup>16</sup> ·6 <sup>18</sup> ·7 <sup>2</sup> }                        | <i>Cryst. Growth &amp; Des.</i> , <b>2008</b> , 8, 3490. | [Zn <sub>8</sub> (μ <sub>3</sub> -OH) <sub>4</sub> ]                                                                                                                                                      |
| [Ln(TTP) <sub>2</sub> ]·(CF <sub>3</sub> SO <sub>3</sub> ) <sub>3</sub> ·C <sub>3</sub> H <sub>6</sub> O·5H <sub>2</sub> O (Ln = Eu,Gd)                                                                                                           | N<br>/<br>A | {4 <sup>20</sup> ·6 <sup>28</sup> ·8 <sup>18</sup> } {4 <sup>3</sup> } <sub>4</sub>                                                                       | <i>Chem. Commun.</i> , <b>2011</b> , 47, 4234.           | Ln <sub>2</sub>                                                                                                                                                                                           |
| [Cd(tipa)(μ <sub>3</sub> -OH)·NO <sub>3</sub> ·EtOH·DMF] <sub>n</sub> (tipa = tris(4-(1H-imidazol-1-yl)phenyl)amine)                                                                                                                              | tt<br>t     | {4 <sup>12</sup> ·6 <sup>42</sup> ·8 <sup>12</sup> } {4 <sup>3</sup> } <sub>4</sub>                                                                       | This work                                                | [Cd <sub>4</sub> (μ <sub>3</sub> -OH) <sub>4</sub> ]                                                                                                                                                      |

As we know, only limited (3,12)-connected coordinated networks have been documented until now. Hardie et. al., reported the first (3,12)-connected supramolecular network built up by hydrogen bonds between tetrameric clusters of cyclotrimeratrylene. Then, Chen group reported the first (3,12)-connected coordination

network based on heptanuclear heterometallic  $[\text{NaZn}_6(\mu_3\text{-OH})_2(\text{COO})_{12}]$  cluster, following this work, they obtained another octanuclear  $[\text{Co}_8(\mu_3\text{-OH})_4(\text{SO}_4)_2(\text{COO})_8]$  cluster based (3,12)-connected network with a Schläfli symbol of  $\{4^{12}\cdot 6^{34}\cdot 8^{20}\}\{4^3\}_4$ . Su et. al., also show us a dinuclear Ln cluster based (3,12)-connected network with a Schläfli symbol of  $\{4^{20}\cdot 6^{28}\cdot 8^{18}\}\{4^3\}_4$ .

**10. Figure S3. The CD spectrum of all crystals of a single batch for 1.**

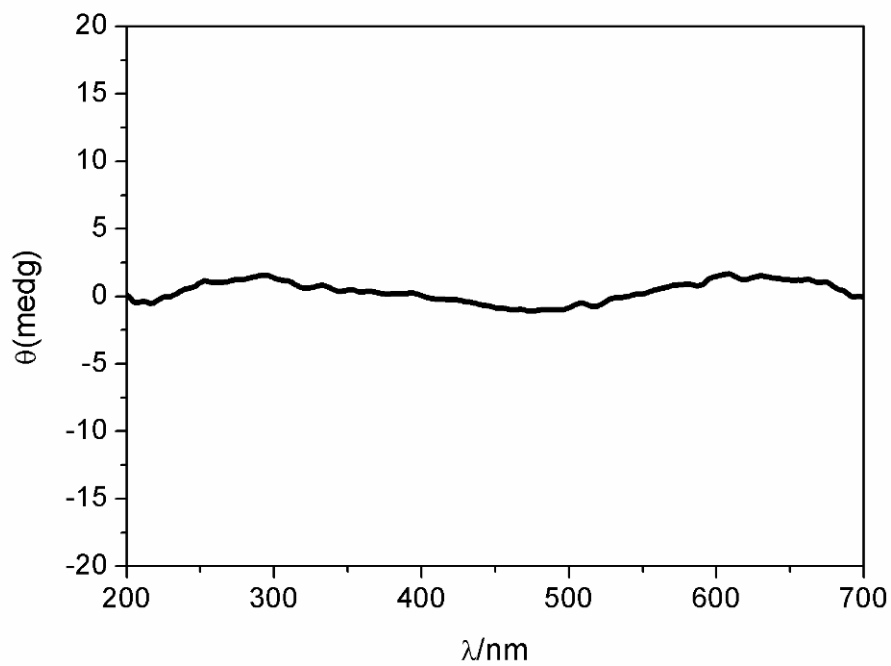

**11. Figure S4. The FT-IR spectra of anion-exchange for 1.**

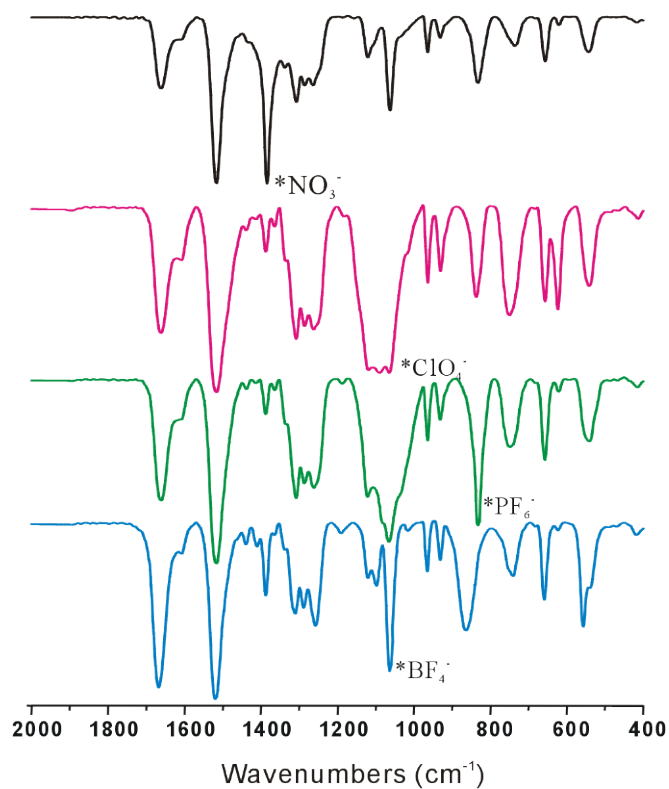

FT-IR spectra of the as-synthesized complex **1** (black), the solid sample treated with saturated DMF solution of NaClO<sub>4</sub> (pink), NH<sub>4</sub>PF<sub>6</sub> (green), and NaBF<sub>4</sub> (cyan).

**12. Table S4. Crystal Data Collection and Structure Refinement for 2**

---

|                                             |                                          |
|---------------------------------------------|------------------------------------------|
| Empirical formula                           | $C_{32}H_{35}CdN_9O_6$                   |
| Formula weight                              | 754.09                                   |
| Temperature/K                               | 120(2)                                   |
| Crystal system                              | Cubic                                    |
| Space group                                 | F23                                      |
| a/Å                                         | 25.49(3)                                 |
| b/Å                                         | 25.49(3)                                 |
| c/Å                                         | 25.49(3)                                 |
| $\alpha/^\circ$                             | 90.00                                    |
| $\beta/^\circ$                              | 90.00                                    |
| $\gamma/^\circ$                             | 90.00                                    |
| Volume/Å <sup>3</sup>                       | 16556(32)                                |
| Z                                           | 16                                       |
| $\rho_{\text{calc}}/\text{mg}/\text{mm}^3$  | 1.210                                    |
| $m/\text{mm}^{-1}$                          | 0.574                                    |
| F(000)                                      | 6176.0                                   |
| Crystal size/ $\text{mm}^3$                 | 0.12 × 0.10 × 0.08                       |
| Radiation                                   | MoK $\alpha$ ( $\lambda = 0.71073$ )     |
| 2 $\Theta$ range for data collection        | 5.3 to 49.92°                            |
| Index ranges                                | -30 ≤ h ≤ 28, -30 ≤ k ≤ 20, -22 ≤ l ≤ 29 |
| Reflections collected                       | 14740                                    |
| Independent reflections                     | 2445 [ $R_{\text{int}} = 0.1424$ ]       |
| Data/restraints/parameters                  | 2445/24/109                              |
| Goodness-of-fit on F <sup>2</sup>           | 0.833                                    |
| Final R indexes [ $I \geq 2\sigma(I)$ ]     | $R_1 = 0.0594$ , $wR_2 = 0.1264$         |
| Final R indexes [all data]                  | $R_1 = 0.1095$ , $wR_2 = 0.1411$         |
| Largest diff. peak/hole / e Å <sup>-3</sup> | 0.57/-0.34                               |
| Flack parameter                             | 0.17(9)                                  |

---

**13. Figure S5. The porous structure of 1A.**

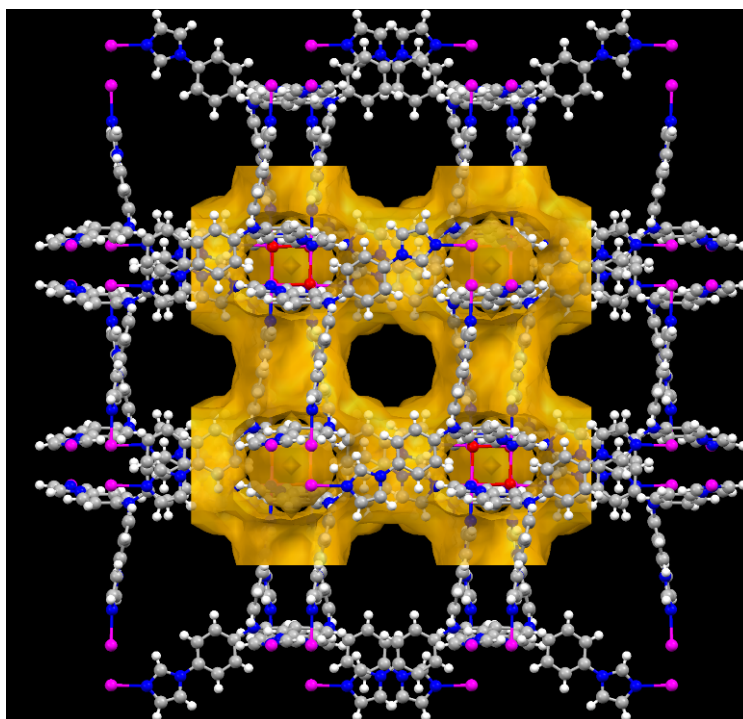

**14. Figure S6. The TGA and Elemental Analysis for 2.**

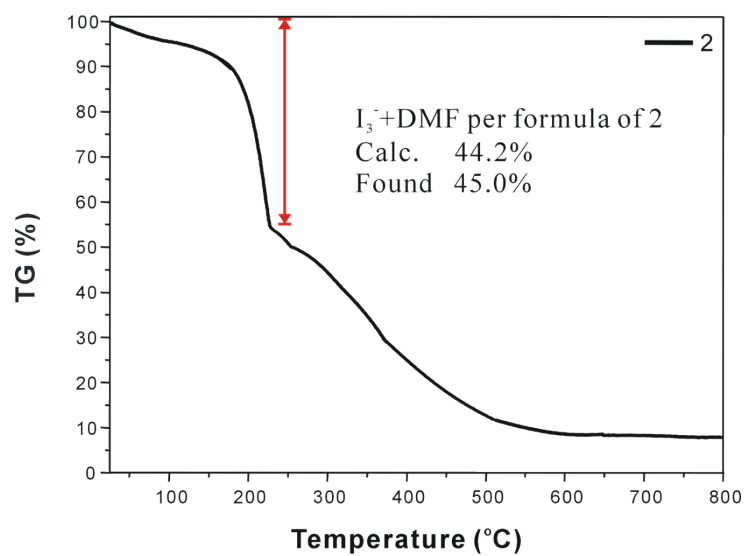

Analysis calculated for C<sub>30</sub>H<sub>29</sub>O<sub>2</sub>N<sub>8</sub>CdI<sub>3</sub> (**2**): C 35.09, H 2.85, N 10.91 %; found: C

35.82, H 2.91, N 11.24 %.

**15. TOPOS result.**

#####

1:C27 H21 Cd N7 O

#####

Topology for Sc1

-----

Atom Sc1 links by bridge ligands and has

| Common vertex with |         |        |        |          | R(A-A)  |   |
|--------------------|---------|--------|--------|----------|---------|---|
| Ti 1               | -0.2500 | 0.7500 | 0.2500 | ( 0 1 0) | 10.734A | 1 |
| Ti 1               | 0.2500  | 0.2500 | 0.2500 | ( 0 0 0) | 10.734A | 1 |
| Ti 1               | 0.2500  | 0.7500 | 0.7500 | ( 0 1 1) | 10.734A | 1 |

Topology for Ti1

-----

Atom Ti1 links by bridge ligands and has

| Common vertex with |         |         |         |            | R(A-A)  |   |
|--------------------|---------|---------|---------|------------|---------|---|
| Sc 1               | 0.1465  | -0.1465 | 0.1465  | ( 0 0 0)   | 10.734A | 1 |
| Sc 1               | -0.1465 | 0.3535  | 0.3535  | ( 0 1 0)   | 10.734A | 1 |
| Sc 1               | 0.3535  | 0.1465  | 0.6465  | ( 0 0 0)   | 10.734A | 1 |
| Sc 1               | -0.1465 | 0.1465  | 0.1465  | ( 0 -1 0)  | 10.734A | 1 |
| Sc 1               | 0.3535  | 0.3535  | -0.1465 | ( 1 0 0)   | 10.734A | 1 |
| Sc 1               | 0.1465  | 0.6465  | 0.3535  | ( 0 0 0)   | 10.734A | 1 |
| Sc 1               | 0.3535  | -0.1465 | 0.3535  | ( 0 0 1)   | 10.734A | 1 |
| Sc 1               | 0.6465  | 0.3535  | 0.1465  | ( 0 0 0)   | 10.734A | 1 |
| Sc 1               | 0.1465  | 0.1465  | -0.1465 | ( 0 -1 -1) | 10.734A | 1 |
| Sc 1               | 0.6465  | 0.1465  | 0.3535  | ( 1 0 1)   | 10.734A | 1 |
| Sc 1               | 0.1465  | 0.3535  | 0.6465  | ( 0 1 1)   | 10.734A | 1 |
| Sc 1               | 0.3535  | 0.6465  | 0.1465  | ( 1 1 0)   | 10.734A | 1 |

-----

Structural group analysis

-----

-----

Structural group No 1

-----

Structure consists of 3D framework with TiSc4

Coordination sequences

-----

|      |   |    |    |     |     |     |     |      |      |      |
|------|---|----|----|-----|-----|-----|-----|------|------|------|
| Sc1: | 1 | 2  | 3  | 4   | 5   | 6   | 7   | 8    | 9    | 10   |
| Num  | 3 | 30 | 22 | 144 | 61  | 336 | 120 | 608  | 199  | 960  |
| Cum  | 4 | 34 | 56 | 200 | 261 | 597 | 717 | 1325 | 1524 | 2484 |

-----





Electronic Supplementary Information (ESI) for *CrystEngComm*

|     |        |        |        |
|-----|--------|--------|--------|
| Sc1 | 0.6465 | 0.1465 | 0.3535 |
| Ti1 | 0.7500 | 0.2500 | 0.7500 |
| Sc1 | 0.8535 | 0.3535 | 0.3535 |

Circuit No 3; Type=6b; Centroid: (0.899,0.052,0.399)

```

-----
Atom      x      y      z
-----
Ti1      1.2500  0.2500  0.2500
Sc1      1.1465 -0.1465  0.1465
Ti1      0.7500 -0.2500  0.2500
Sc1      0.6465 -0.1465  0.6465
Ti1      0.7500  0.2500  0.7500
Sc1      0.8535  0.3535  0.3535

```

Circuit No 4; Type=6c; Centroid: (0.351,0.851,0.149)

```

-----
Atom      x      y      z
-----
Ti1      0.2500  1.2500  0.2500
Sc1      0.1465  0.8535  0.1465
Ti1      0.2500  0.7500 -0.2500
Sc1      0.3535  0.6465  0.1465
Ti1      0.7500  0.7500  0.2500
Sc1      0.3535  0.8535  0.3535

```

Circuit No 5; Type=6d; Centroid: (0.448,0.052,0.948)

```

-----
Atom      x      y      z
-----
Ti1      0.2500  0.2500  1.2500
Sc1      0.1465 -0.1465  1.1465
Ti1      0.2500 -0.2500  0.7500
Sc1      0.6465 -0.1465  0.6465
Ti1      0.7500  0.2500  0.7500
Sc1      0.6465  0.3535  1.1465

```

Circuit No 6; Type=8a; Centroid: (0.787,0.213,0.250)

```

-----
Atom      x      y      z
-----
Ti1      1.2500  0.2500  0.2500
Sc1      1.1465  0.6465  0.3535
Ti1      0.7500  0.7500  0.2500

```

Electronic Supplementary Information (ESI) for *CrystEngComm*

|     |        |         |        |
|-----|--------|---------|--------|
| Sc1 | 0.6465 | 0.3535  | 0.1465 |
| Ti1 | 0.2500 | 0.2500  | 0.2500 |
| Sc1 | 0.3535 | -0.1465 | 0.3535 |
| Ti1 | 0.7500 | -0.2500 | 0.2500 |
| Sc1 | 1.1465 | -0.1465 | 0.1465 |

Circuit No 7; Type=8b; Centroid: (0.750,0.250,0.250)

| ----- |        |         |        |
|-------|--------|---------|--------|
| Atom  | x      | y       | z      |
| ----- |        |         |        |
| Ti1   | 1.2500 | 0.2500  | 0.2500 |
| Sc1   | 1.1465 | 0.6465  | 0.3535 |
| Ti1   | 0.7500 | 0.7500  | 0.2500 |
| Sc1   | 0.3535 | 0.6465  | 0.1465 |
| Ti1   | 0.2500 | 0.2500  | 0.2500 |
| Sc1   | 0.3535 | -0.1465 | 0.3535 |
| Ti1   | 0.7500 | -0.2500 | 0.2500 |
| Sc1   | 1.1465 | -0.1465 | 0.1465 |

Circuit No 8; Type=8c; Centroid: (0.823,0.250,0.250)

| ----- |        |         |        |
|-------|--------|---------|--------|
| Atom  | x      | y       | z      |
| ----- |        |         |        |
| Ti1   | 1.2500 | 0.2500  | 0.2500 |
| Sc1   | 1.1465 | 0.6465  | 0.3535 |
| Ti1   | 0.7500 | 0.7500  | 0.2500 |
| Sc1   | 0.6465 | 0.3535  | 0.1465 |
| Ti1   | 0.2500 | 0.2500  | 0.2500 |
| Sc1   | 0.6465 | 0.1465  | 0.3535 |
| Ti1   | 0.7500 | -0.2500 | 0.2500 |
| Sc1   | 1.1465 | -0.1465 | 0.1465 |

Circuit No 9; Type=8d; Centroid: (0.912,0.250,0.338)

| ----- |        |         |        |
|-------|--------|---------|--------|
| Atom  | x      | y       | z      |
| ----- |        |         |        |
| Ti1   | 1.2500 | 0.2500  | 0.2500 |
| Sc1   | 1.1465 | 0.6465  | 0.3535 |
| Ti1   | 0.7500 | 0.7500  | 0.2500 |
| Sc1   | 0.8535 | 0.3535  | 0.3535 |
| Ti1   | 0.7500 | 0.2500  | 0.7500 |
| Sc1   | 0.6465 | 0.1465  | 0.3535 |
| Ti1   | 0.7500 | -0.2500 | 0.2500 |
| Sc1   | 1.1465 | -0.1465 | 0.1465 |

Electronic Supplementary Information (ESI) for *CrystEngComm*

Circuit No 10; Type=8e; Centroid: (0.011,0.250,0.438)

```

-----
Atom      x      y      z
-----
Ti1      0.2500  0.2500  0.2500
Sc1      0.1465  0.6465  0.3535
Ti1      0.2500  0.7500  0.7500
Sc1      0.1465  0.3535  0.6465
Ti1     -0.2500  0.2500  0.7500
Sc1     -0.3535  0.1465  0.3535
Ti1     -0.2500 -0.2500  0.2500
Sc1      0.1465 -0.1465  0.1465
    
```

Circuit No 11; Type=8f; Centroid: (0.974,0.287,0.438)

```

-----
Atom      x      y      z
-----
Ti1      1.2500  0.2500  0.2500
Sc1      1.1465  0.6465  0.3535
Ti1      1.2500  0.7500  0.7500
Sc1      0.8535  0.6465  0.6465
Ti1      0.7500  0.2500  0.7500
Sc1      0.6465  0.1465  0.3535
Ti1      0.7500 -0.2500  0.2500
Sc1      1.1465 -0.1465  0.1465
    
```

Circuit No 12; Type=8g; Centroid: (0.912,0.287,0.375)

```

-----
Atom      x      y      z
-----
Ti1      1.2500  0.2500  0.2500
Sc1      1.1465  0.6465  0.3535
Ti1      0.7500  0.7500  0.2500
Sc1      0.8535  0.6465  0.6465
Ti1      0.7500  0.2500  0.7500
Sc1      0.6465  0.1465  0.3535
Ti1      0.7500 -0.2500  0.2500
Sc1      1.1465 -0.1465  0.1465
    
```

Circuit No 13; Type=8h; Centroid: (0.912,0.213,0.375)

```

-----
Atom      x      y      z
-----
    
```

Electronic Supplementary Information (ESI) for *CrystEngComm*

|     |        |         |        |
|-----|--------|---------|--------|
| Ti1 | 1.2500 | 0.2500  | 0.2500 |
| Sc1 | 1.1465 | 0.6465  | 0.3535 |
| Ti1 | 0.7500 | 0.7500  | 0.2500 |
| Sc1 | 0.8535 | 0.3535  | 0.3535 |
| Ti1 | 0.7500 | 0.2500  | 0.7500 |
| Sc1 | 0.6465 | -0.1465 | 0.6465 |
| Ti1 | 0.7500 | -0.2500 | 0.2500 |
| Sc1 | 1.1465 | -0.1465 | 0.1465 |

Circuit No 14; Type=8i; Centroid: (0.011,0.213,0.474)

```
-----
Atom      x      y      z
-----
Ti1      0.2500  0.2500  0.2500
Sc1      0.1465  0.6465  0.3535
Ti1      0.2500  0.7500  0.7500
Sc1      0.1465  0.3535  0.6465
Ti1     -0.2500  0.2500  0.7500
Sc1     -0.3535 -0.1465  0.6465
Ti1     -0.2500 -0.2500  0.2500
Sc1      0.1465 -0.1465  0.1465
```

Circuit No 15; Type=8j; Centroid: (0.974,0.250,0.474)

```
-----
Atom      x      y      z
-----
Ti1      1.2500  0.2500  0.2500
Sc1      1.1465  0.6465  0.3535
Ti1      1.2500  0.7500  0.7500
Sc1      0.8535  0.6465  0.6465
Ti1      0.7500  0.2500  0.7500
Sc1      0.6465 -0.1465  0.6465
Ti1      0.7500 -0.2500  0.2500
Sc1      1.1465 -0.1465  0.1465
```

Circuit No 16; Type=8k; Centroid: (0.912,0.250,0.412)

```
-----
Atom      x      y      z
-----
Ti1      1.2500  0.2500  0.2500
Sc1      1.1465  0.6465  0.3535
Ti1      0.7500  0.7500  0.2500
Sc1      0.8535  0.6465  0.6465
Ti1      0.7500  0.2500  0.7500
```

Electronic Supplementary Information (ESI) for *CrystEngComm*

Sc1 0.6465 -0.1465 0.6465  
 Ti1 0.7500 -0.2500 0.2500  
 Sc1 1.1465 -0.1465 0.1465

Circuit No 17; Type=8l; Centroid: (0.375,0.213,0.912)

```
-----
Atom      x      y      z
-----
Ti1      0.2500  0.2500  1.2500
Sc1      0.3535  0.6465  1.1465
Ti1      0.2500  0.7500  0.7500
Sc1      0.3535  0.3535  0.8535
Ti1      0.7500  0.2500  0.7500
Sc1      0.6465 -0.1465  0.6465
Ti1      0.2500 -0.2500  0.7500
Sc1      0.1465 -0.1465  1.1465
```

Circuit No 18; Type=8m; Centroid: (0.474,0.213,0.011)

```
-----
Atom      x      y      z
-----
Ti1      0.2500  0.2500  0.2500
Sc1      0.3535  0.6465  0.1465
Ti1      0.7500  0.7500  0.2500
Sc1      0.6465  0.3535  0.1465
Ti1      0.7500  0.2500 -0.2500
Sc1      0.6465 -0.1465 -0.3535
Ti1      0.2500 -0.2500 -0.2500
Sc1      0.1465 -0.1465  0.1465
```

Circuit No 19; Type=8n; Centroid: (0.338,0.250,0.912)

```
-----
Atom      x      y      z
-----
Ti1      0.2500  0.2500  1.2500
Sc1      0.3535  0.6465  1.1465
Ti1      0.2500  0.7500  0.7500
Sc1      0.3535  0.3535  0.8535
Ti1      0.7500  0.2500  0.7500
Sc1      0.3535  0.1465  0.6465
Ti1      0.2500 -0.2500  0.7500
Sc1      0.1465 -0.1465  1.1465
```

Circuit No 20; Type=8o; Centroid: (0.437,0.250,0.011)

Electronic Supplementary Information (ESI) for *CrystEngComm*

```

-----
Atom      x      y      z
-----
Ti1      0.2500  0.2500  0.2500
Sc1      0.3535  0.6465  0.1465
Ti1      0.7500  0.7500  0.2500
Sc1      0.6465  0.3535  0.1465
Ti1      0.7500  0.2500 -0.2500
Sc1      0.3535  0.1465 -0.3535
Ti1      0.2500 -0.2500 -0.2500
Sc1      0.1465 -0.1465  0.1465

```

Circuit No 21; Type=8p; Centroid: (0.437,0.287,0.974)

```

-----
Atom      x      y      z
-----
Ti1      0.2500  0.2500  1.2500
Sc1      0.3535  0.6465  1.1465
Ti1      0.7500  0.7500  1.2500
Sc1      0.6465  0.6465  0.8535
Ti1      0.7500  0.2500  0.7500
Sc1      0.3535  0.1465  0.6465
Ti1      0.2500 -0.2500  0.7500
Sc1      0.1465 -0.1465  1.1465

```

Circuit No 22; Type=8q; Centroid: (0.375,0.287,0.912)

```

-----
Atom      x      y      z
-----
Ti1      0.2500  0.2500  1.2500
Sc1      0.3535  0.6465  1.1465
Ti1      0.2500  0.7500  0.7500
Sc1      0.6465  0.6465  0.8535
Ti1      0.7500  0.2500  0.7500
Sc1      0.3535  0.1465  0.6465
Ti1      0.2500 -0.2500  0.7500
Sc1      0.1465 -0.1465  1.1465

```

Circuit No 23; Type=8r; Centroid: (0.250,0.250,0.823)

```

-----
Atom      x      y      z
-----
Ti1      0.2500  0.2500  1.2500
Sc1      0.3535  0.6465  1.1465

```

Electronic Supplementary Information (ESI) for *CrystEngComm*

|     |        |         |        |
|-----|--------|---------|--------|
| Ti1 | 0.2500 | 0.7500  | 0.7500 |
| Sc1 | 0.1465 | 0.3535  | 0.6465 |
| Ti1 | 0.2500 | 0.2500  | 0.2500 |
| Sc1 | 0.3535 | 0.1465  | 0.6465 |
| Ti1 | 0.2500 | -0.2500 | 0.7500 |
| Sc1 | 0.1465 | -0.1465 | 1.1465 |

Elapsed time: 7.84 sec.
